# Supplementary material for: Surface Modified Characteristics of the Tetracalcium Phosphate as Light‐Cured Composite Resin Fillers
Source: Hindawi journal article supplement (doi:10.1155/2014/709482), 2014-01-01

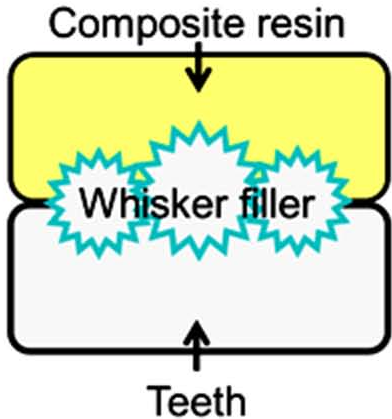

Benefits of nanowhiskers treated on particle surfaces

1. Increase physical bonding
2. Increase chemical bonding
3. Have the function of rematerialize

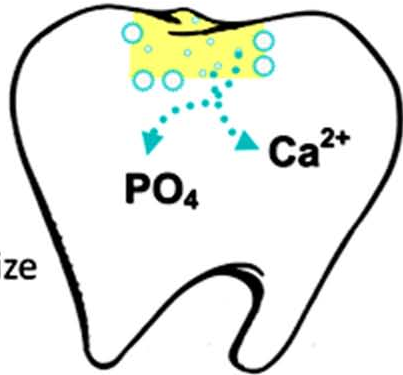

Supplement: f1 [file 709482.f1.pdf]
